# Supplementary material for: Multimodal data integration using machine learning improves risk stratification of high-grade serous ovarian cancer
Source: PubMed Central journal article supplement (PMC9239907; doi:10.1038/s43018-022-00388-9), 2022-06-28
Supplement: 43018_2022_388_MOESM1_ESM.pdf [file 43018_2022_388_MOESM1_ESM.pdf]

**Supplementary information**

---

**Multimodal data integration using machine learning improves risk stratification of high-grade serous ovarian cancer**

---

In the format provided by the authors and unedited

## MSK MIND Consortium Members

| Name                        | Department                                   |
|-----------------------------|----------------------------------------------|
| Sohrab P. Shah, PhD         | Epidemiology & Biostatistics                 |
| Jianjiong Gao, PhD          | Epidemiology & Biostatistics                 |
| Paul Sabbatini, MD          | Medicine                                     |
| Peter D. Stetson, MD        | Medicine                                     |
| Nathaniel Swinburne, MD     | Radiology                                    |
| Nikolaus Schultz, PhD       | Epidemiology & Biostatistics                 |
| Matthew Hellmann, MD        | Medicine                                     |
| Yulia Lakhman, MD           | Radiology                                    |
| Mithat Gonen, PhD           | Epidemiology & Biostatistics                 |
| Pedram Razavi, MD, PhD      | Medicine                                     |
| Elizabeth Sutton, MD        | Radiology                                    |
| Pegah Khosravi, PhD         | Epidemiology & Biostatistics                 |
| Kevin Boehm, PhD            | Graduate Medical Education                   |
| Rami Vanguri, PhD           | Epidemiology & Biostatistics                 |
| Justin Jee, MD, PhD         | Medicine                                     |
| Karl Pichotta, PhD          | Epidemiology & Biostatistics                 |
| Christopher Fong, PhD       | Epidemiology & Biostatistics                 |
| Arfath Pasha                | Epidemiology & Biostatistics                 |
| Doori Rose                  | Epidemiology & Biostatistics                 |
| Essam Elsherif              | Epidemiology & Biostatistics                 |
| Andrew Aukerman             | Epidemiology & Biostatistics                 |
| Druv Patel                  | Epidemiology & Biostatistics                 |
| Anika Begum                 | Epidemiology & Biostatistics                 |
| Elizabeth Zakszewski, PhD   | Epidemiology & Biostatistics                 |
| Benjamin Gross              | Center for Molecular Oncology                |
| John Philip                 | Health Informatics                           |
| Luke Geneslaw               | Pathology                                    |
| Robert Pimienta             | Digital Informatics and Technology Solutions |
| Surya Narayana Rangavajhala | Digital Informatics and Technology Solutions |
